# Supplementary material
Source: PubMed Central journal article supplement (PMC6587035)
Supplement: plantbiotechnology-33-5-16.0926a-s001.pdf [file plantbiotechnology-33-5-16.0926a-s001.pdf]

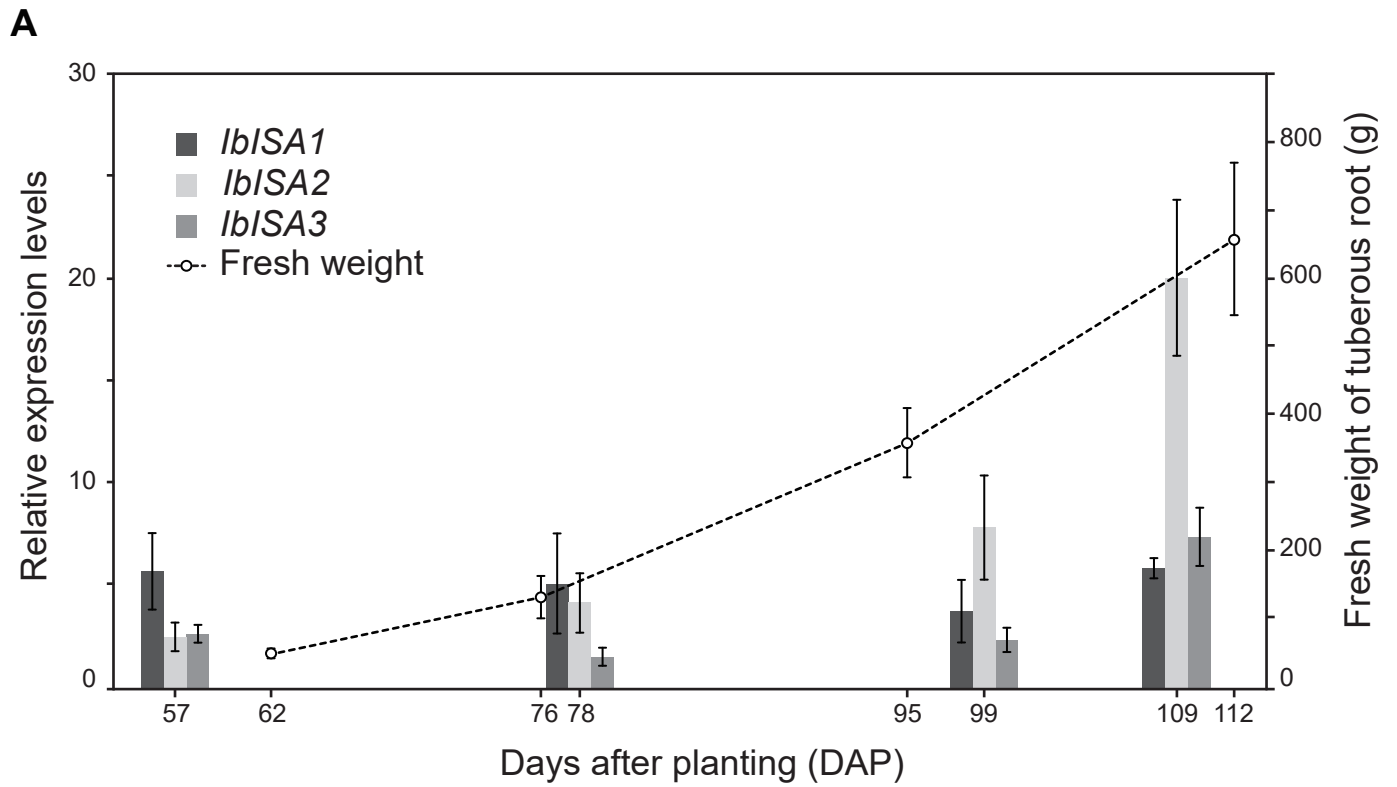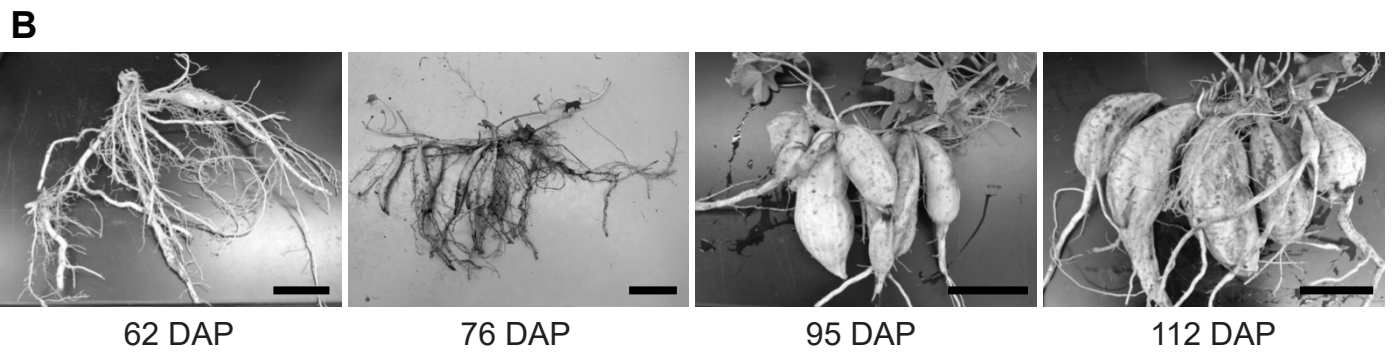

Supplementary Figure S1. Relationship between morphological change of tuberous roots and the expression level of *IbISAs*. (A) Transcripts level of *IbISAs* and fresh weight of tuberous roots. (B) Morphological change of tuberous roots at 62, 76, 95, 112 days after planting. Bar= 10 cm.
