# Supplementary material
Source: PubMed Central journal article supplement (PMC6587035)
Supplement: plantbiotechnology-33-5-16.0926a-s002.pdf [file plantbiotechnology-33-5-16.0926a-s002.pdf]

Supplementary Table S1. Primer sequences used in this study

| Purpose                                    | Name of primer  | Primer sequences (5' → 3')     |
|--------------------------------------------|-----------------|--------------------------------|
| IbISA1 specific 5'RACE (degenerate primer) | Ibsu15Ra        | GGGCTTCCACAAAGGCATTCAGCAA      |
|                                            | Ibsu15Rb        | AAACCCTCCCTCCTGGCCACAATTCC     |
| IbISA1 specific 3'RACE                     | Ibsu13Fa        | TGCATGTTGATGGCTTCCGCTTTGA      |
|                                            | Ibsu13Fan1      | TGCTTCCATCCTGACGAGAGTAGCAGGTG  |
| IbISA2 specific 5'RACE                     | Ibisa25Ra       | AGGAGGCCACATAAGTGCCAGGTGA      |
|                                            | Ibisa25Rb       | ATCCCATTIGCGTGGACTTICTTGACCAT  |
| IbISA2 specific 3'RACE                     | Ibisa23Fa       | ATGGCTCTTTGCCGTTTGTGGGCTATG    |
|                                            | Ibisa23Fan1     | TGCAAGGGGGCCACTGCTGAGAAGAC     |
| IbISA3 specific 5'RACE                     | IbISA35Ra       | GGGGAGCATCAAGTGGAGTGCCATCTG    |
|                                            | Ibisa35Ran1     | CAAACCGAAACCCATCCACGTGATACTC   |
| IbISA3 specific 3'RACE                     | IbISA33Fa       | CAAAGGAGGCCAAATCCACGAGACCA     |
|                                            | Ibisa33Fan1     | ATGCAAGTGCTGGTGGGGGACCCGT      |
| IbISA1 full length sequence                | Ibsu1-full-5F   | GCTCAAATCGGAAATGGAGTTGATTCA    |
|                                            | Ibsu1-full-3R   | GGTAAAACACACTCCTTTTCATGGTCA    |
| IbISA2 full length sequence                | Ibisa2-full-5F  | GGCGCAGTCTCAAGTTCAATGCGGATT    |
|                                            | Ibisa2-full-3Rb | AATGATTGAACTGCAAAGCTTTTTATTAAA |
| IbISA3 full length sequence                | Ibisa3-full-5F  | CAGTTTCAGATTCCCTACACGAAAATA    |
|                                            | Ibisa3-full-3R  | AAAATAATTTTGCCATAAATATGCAG     |
| IbISA1 qRT-PCR                             | IbISA1RT_F      | ATGGCCATACTCCAGGGATG           |
|                                            | IbISA1RT_R      | ACCGATAACCACCTCGTTCC           |
| IbISA2 qRT-PCR                             | IbISA2RT_F      | AGGGGTAATGGCTCTCTCAGC          |
|                                            | IbISA2RT_R      | TAGGACCTTCTCCCCACAGT           |
| IbISA3 qRT-PCR                             | IbISA3RT_F      | TATCACGTGGATGGGTTTCG           |
|                                            | IbISA3RT_R      | CCACAATCCCATGGTTCTGA           |
| COX qRT-PCR                                | IbCOXRT_F *     | ACTGGAACAGCCAG                 |
|                                            | IbCOXRT_R *     | ATGCAATCTTCATGGGTTC            |
| ARF qRT-PCR                                | IbARFRT_F *     | CTTTGCCAAGAAGGAGATGC           |
|                                            | IbARFRT_R       | AATCTTGTCTGGCCACCAA            |

\* Primer sequences information obtained from Park et al. 2012
